# Supplementary material for: MXene quantum lands: emerging trends and breakthroughs
Source: Royal Society of Chemistry journal article supplement (doi:10.1039/d5nr03616j), 2025-12-19
Supplement: d5nr03616j1.pdf [file d5nr03616j1.pdf]

## MXene Quantum Lands: Emerging Trends and Breakthroughs

Mahdi Hasanazadeh Azar <sup>a, b, \*</sup>, Fatemeh Etehad <sup>c, m</sup>, Nima Mohamadbeigi <sup>d</sup>, Hessam Shahbazi <sup>e, f</sup>, Sara Salehi Siouki <sup>g</sup>, Ali Mirsepah <sup>h</sup>, Mohammad Reza Rahmani Taji Boyuk <sup>i</sup>, Ahmad Alem <sup>g</sup>, Amir Hatamie <sup>j</sup>, Abdolreza Simchi <sup>\*, k</sup>, Shayan Angizi <sup>\*, l</sup>

<sup>a</sup> Department of Mechanical and Mechatronics Engineering, University of Waterloo, Waterloo, Ontario N2L 3G1, Canada

<sup>b</sup> Waterloo Institute for Nanotechnology, University of Waterloo, Waterloo, Ontario, Canada

<sup>c</sup> Leibniz Institute for Composite Materials GmbH (IVW), Erwin-Schrödinger Str. 58, 67663 Kaiserslautern, Germany

<sup>d</sup> Department of Materials Science and Engineering, Imam Khomeini International University (IKIU), Qazvin 3414916818, Iran

<sup>e</sup> Department of Mechanical and Industrial Engineering, University of Illinois Chicago, Chicago, IL, 60607 USA

<sup>f</sup> Department of Electrical and Computer Engineering, University of Illinois Chicago, Chicago, IL, 60607 USA

<sup>g</sup> Department of Polymer Engineering and Science, Technical University of Leoben, Otto-Glöckel-Strasse 2, A-8700 Leoben, Austria

<sup>h</sup> Department of Physics, Isfahan University of Technology, Isfahan 84156-83111, Iran.

<sup>i</sup> School of Metallurgy and Materials Engineering, College of Engineering, University of Tehran, P.O. Box: 11155-4563, Tehran, Iran,

<sup>j</sup> Department of Chemistry, Institute for Advanced Studies in Basic Science (IASBS), No. 444, Prof. Yousef Sobouti Boulevard, Zanjan 45137-66731, Iran

<sup>k</sup> Fraunhofer Institute for Manufacturing Technology and Advanced Materials, 28359 Bremen, Germany

<sup>l</sup> Department of Mechanical and Industrial Engineering, University of Toronto, 5 King's College Road, Toronto, Ontario M5S 3G8, Canada

<sup>m</sup> Institute for Automation and Applied Informatics, Karlsruhe Institute of Technology, Hermann-von-Helmholtz-Platz 1, 76344 Eggenstein-Leopoldshafen, Germany

### \*Corresponding authors' emails:

Mahdi Hasanazadeh Azar: [mhasanza@uwaterloo.ca](mailto:mhasanza@uwaterloo.ca)

Abdolreza Simchi: [abdolreza.simchi@ifam.fraunhofer.de](mailto:abdolreza.simchi@ifam.fraunhofer.de)

Shayan Angizi: [shayan.angizi@utoronto.ca](mailto:shayan.angizi@utoronto.ca)

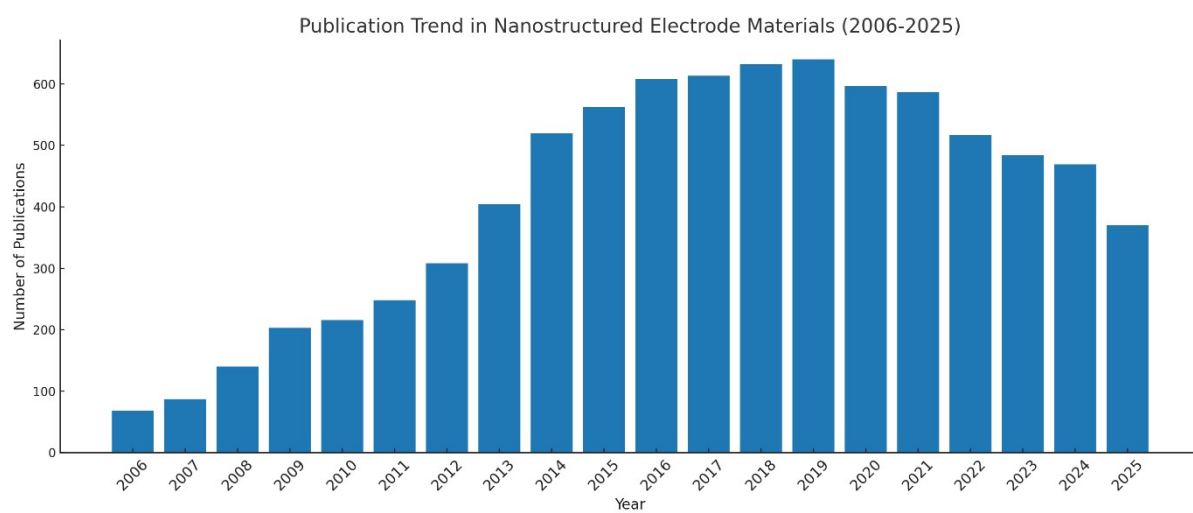

**Fig. S1.** Annual number of publications on nanostructured electrode materials from 2006 to 2025.

**Table S1.** Advantages and Limitations of Different MQD Synthesis Methods.

| Approach                                | Advantages                                                                                                                                                                                                                                                                                                                                                                                                                      | Limitations/Risks                                                                                                                                                                                                                                                                                                                                                                                                                                                                    |
|-----------------------------------------|---------------------------------------------------------------------------------------------------------------------------------------------------------------------------------------------------------------------------------------------------------------------------------------------------------------------------------------------------------------------------------------------------------------------------------|--------------------------------------------------------------------------------------------------------------------------------------------------------------------------------------------------------------------------------------------------------------------------------------------------------------------------------------------------------------------------------------------------------------------------------------------------------------------------------------|
| <b>Sonication-Assisted Exfoliation</b>  | <ul style="list-style-type: none"> <li>• Simple, safe, and low-cost process under ambient conditions</li> <li>• Requires minimal reagents or specialized equipment</li> <li>• Compatible with various MXene precursors and solvents</li> </ul>                                                                                                                                                                                  | <ul style="list-style-type: none"> <li>• Low yield and lengthy exfoliation time</li> <li>• Limited control over lateral size and surface termination</li> <li>• Structural degradation due to cavitation-induced defects</li> <li>• Poor reproducibility across large batches</li> </ul>                                                                                                                                                                                             |
| <b>Hydrothermal</b>                     | <ul style="list-style-type: none"> <li>• Enables precise control of morphology, crystallinity, and particle size under optimized conditions</li> <li>• Facilitates heteroatom doping and surface functionalization through controlled reaction environment</li> <li>• Operates in a closed system that supports homogeneous nucleation</li> <li>• Offers scalability and compatibility with diverse MXene precursors</li> </ul> | <ul style="list-style-type: none"> <li>• Sensitive to reaction parameters—minor deviations in temperature, pressure, or pH can trigger undesired phase transitions</li> <li>• High probability of surface oxidation and defect formation due to hydrolysis or residual oxygen species</li> <li>• Energy- and reagent-intensive process with long reaction duration</li> <li>• Possible formation of nonstoichiometric or amorphous intermediates in suboptimal conditions</li> </ul> |
| <b>Solvothermal</b>                     | <ul style="list-style-type: none"> <li>• Enables size and morphology tuning with selective surface/edge functionalization</li> <li>• Produces stable colloidal dispersions with reduced agglomeration</li> <li>• Applicable for hybrid and doped MQD synthesis</li> <li>• Higher reaction uniformity than hydrothermal method</li> </ul>                                                                                        | <ul style="list-style-type: none"> <li>• Use of toxic organic solvents may pose environmental and safety concerns</li> <li>• Moderate yield and material loss during purification</li> <li>• Requires strict control of solvent polarity and surfactant ratio</li> </ul>                                                                                                                                                                                                             |
| <b>Reflux Condensation</b>              | <ul style="list-style-type: none"> <li>• Mild reaction conditions and reduced oxidation tendency</li> <li>• Continuous reaction pathway allows gradual QD nucleation</li> <li>• Suitable for obtaining uniform size in prolonged heating</li> </ul>                                                                                                                                                                             | <ul style="list-style-type: none"> <li>• Long processing time (up to several hours)</li> <li>• Complex setup and limited scalability</li> <li>• Restricted morphology control and narrow compositional range</li> </ul>                                                                                                                                                                                                                                                              |
| <b>Micro-Explosion / Laser Ablation</b> | <ul style="list-style-type: none"> <li>• Rapid, energy-efficient synthesis under ambient or mild conditions</li> <li>• Free of hazardous chemicals and environmentally benign</li> <li>• Facilitates direct synthesis of ultrafine MQDs from MXene films</li> </ul>                                                                                                                                                             | <ul style="list-style-type: none"> <li>• Broad size distribution and limited control over morphology</li> <li>• Multiple purification steps required to remove ablation debris</li> <li>• Low yield per batch and equipment-dependent reproducibility</li> </ul>                                                                                                                                                                                                                     |
| <b>Microwave-Assisted</b>               | <ul style="list-style-type: none"> <li>• Uniform volumetric heating enables rapid and homogeneous nucleation</li> <li>• Significantly shortened reaction time (minutes)</li> <li>• Reduced oxidation compared to conventional thermal routes</li> </ul>                                                                                                                                                                         | <ul style="list-style-type: none"> <li>• Risk of non-uniform particle growth and phase instability</li> <li>• Localized overheating may induce structural collapse</li> <li>• Limited scalability and vessel design dependence</li> </ul>                                                                                                                                                                                                                                            |
| <b>Molten Salt</b>                      | <ul style="list-style-type: none"> <li>• High crystallinity and precise morphology control</li> <li>• Solvent-free etching medium and allows for the use of non-fluorine containing salts, making it a potentially environmentally benign process</li> </ul>                                                                                                                                                                    | <ul style="list-style-type: none"> <li>• High temperature and energy consumption</li> <li>• Tedious purification to remove residual salts/by-products</li> <li>• Potential interfacial contamination from molten medium</li> </ul>                                                                                                                                                                                                                                                   |

- 
- Promotes surface termination control through molten ionic media
-
